# Supplementary material for: Research on Measurement of Manufacturing Industry Chain Resilience Based on Index Contribution Model Driven by Digital Economy
Source: publisher site journal article supplement (doi:10.1515/econ-2022-0123), 2024-01-01
Supplement: Supplementary file [file Original_submission.pdf]

# Economics

## Research on Measurement of Manufacturing Industry Chain Resilience Based on Index Contribution Model Driven by Digital Economy --Manuscript Draft--

|                                     |                                                                                                                                                                                                                                                                                                                                                                                                                                                                                                                                                                                                                                                                                                                                                                                                                                                                                                                                                                                                                                                                                                                                                                                                                   |
|-------------------------------------|-------------------------------------------------------------------------------------------------------------------------------------------------------------------------------------------------------------------------------------------------------------------------------------------------------------------------------------------------------------------------------------------------------------------------------------------------------------------------------------------------------------------------------------------------------------------------------------------------------------------------------------------------------------------------------------------------------------------------------------------------------------------------------------------------------------------------------------------------------------------------------------------------------------------------------------------------------------------------------------------------------------------------------------------------------------------------------------------------------------------------------------------------------------------------------------------------------------------|
| <b>Manuscript Number:</b>           | ECONJOURNAL-D-24-00035                                                                                                                                                                                                                                                                                                                                                                                                                                                                                                                                                                                                                                                                                                                                                                                                                                                                                                                                                                                                                                                                                                                                                                                            |
| <b>Full Title:</b>                  | Research on Measurement of Manufacturing Industry Chain Resilience Based on Index Contribution Model Driven by Digital Economy                                                                                                                                                                                                                                                                                                                                                                                                                                                                                                                                                                                                                                                                                                                                                                                                                                                                                                                                                                                                                                                                                    |
| <b>Article Type:</b>                | Research Article                                                                                                                                                                                                                                                                                                                                                                                                                                                                                                                                                                                                                                                                                                                                                                                                                                                                                                                                                                                                                                                                                                                                                                                                  |
| <b>Keywords:</b>                    | manufacturing sector; digital economy; resilience; industry chains; research; examination; index contribution model.                                                                                                                                                                                                                                                                                                                                                                                                                                                                                                                                                                                                                                                                                                                                                                                                                                                                                                                                                                                                                                                                                              |
| <b>Manuscript Region of Origin:</b> | CHINA                                                                                                                                                                                                                                                                                                                                                                                                                                                                                                                                                                                                                                                                                                                                                                                                                                                                                                                                                                                                                                                                                                                                                                                                             |
| <b>Abstract:</b>                    | <p>In the dynamic landscape of contemporary industries, the manufacturing sector is intricately connected to the transformative currents of the digital economy. This research focuses on evaluating the resilience of manufacturing industry chains amid ongoing digital transformations. The primary objective is to comprehend the robustness of these chains in the face of evolving digital dynamics. Employing a groundbreaking index contribution model, our approach offers a novel perspective on assessing manufacturing resilience, shaped by the relentless progressions of the digital economy. The study delves into the challenges and strengths inherent in manufacturing industry chains, unveiling nuanced insights. The innovative model serves as a valuable tool, providing actionable insights for stakeholders to navigate and enhance resilience in the evolving industrial sphere. As the manufacturing sector remains a linchpin in this dynamic landscape, proactive measures are imperative for sustained growth and adaptability. This research contributes a novel methodological approach, offering a compass to navigate the complexities of modern manufacturing resilience.</p> |
| <b>Manuscript Classifications:</b>  | 7: Financial Economics; 13: Business Administration and Business Economics • Marketing • Accounting • Personnel Economics                                                                                                                                                                                                                                                                                                                                                                                                                                                                                                                                                                                                                                                                                                                                                                                                                                                                                                                                                                                                                                                                                         |

# Research on Measurement of Manufacturing Industry Chain Resilience

## Based on Index Contribution Model Driven by Digital Economy

Minglu Xia

Northeast Normal University, School of Economics and Management, Changchun 130000, Jilin, China. Email: [xiaml155@nenu.edu.cn](mailto:xiaml155@nenu.edu.cn), Minglu945xia@gmail.com.

### ABSTRACT

In the dynamic landscape of contemporary industries, the manufacturing sector is intricately connected to the transformative currents of the digital economy. This research focuses on evaluating the resilience of manufacturing industry chains amid ongoing digital transformations. The primary objective is to comprehend the robustness of these chains in the face of evolving digital dynamics. Employing a groundbreaking index contribution model, our approach offers a novel perspective on assessing manufacturing resilience, shaped by the relentless progressions of the digital economy. The study delves into the challenges and strengths inherent in manufacturing industry chains, unveiling nuanced insights. The innovative model serves as a valuable tool, providing actionable insights for stakeholders to navigate and enhance resilience in the evolving industrial sphere. As the manufacturing sector remains a linchpin in this dynamic landscape, proactive measures are imperative for sustained growth and adaptability. This research contributes a novel methodological approach, offering a compass to navigate the complexities of modern manufacturing resilience.

**Keywords:** manufacturing sector, digital economy, resilience, industry chains, research, examination, index contribution model.

### INTRODUCTION

The realm of manufacturing, a pivotal driver of economic progress, is experiencing a transformative shift propelled by the digital economy. This investigation aims to contribute to the comprehension of manufacturing industry chain resilience in the digital era. We introduce a model for index contribution, encompassing diverse dimensions of resilience and establishing the foundation for a comprehensive evaluation framework (Le, Ferraris, & Dhar, 2023).

In the forefront of economic advancement, the contemporary landscape of the manufacturing industry undergoes a metamorphosis, where traditional production principles are being redefined by the transformative forces of the digital economy. As we navigate through this ever-changing domain, the motivation for this study lies in deciphering the complexities that characterize the resilience of manufacturing industry chains amidst the era of digital transformation.

Against the backdrop of swift technological progress and the pervasive influence of the digital economy, grasping the nuanced dynamics of resilience becomes imperative. This research endeavour aspires to be a beacon in elucidating the intricate interplay between digital evolution and the robustness of manufacturing industry chains. In this pursuit, we introduce a novel conceptual framework—a meticulously crafted index contribution model designed to capture the diverse dimensions of resilience within this dynamic ecosystem.

## **Research Background or Problem Statement**

The proposed index contribution model is not merely a theoretical construct; rather, it represents a tangible approach to comprehensively evaluate the resilience of manufacturing industry chains. By encapsulating the multifaceted nature of resilience, our model provides a structured and systematic means of analysis. It lays the foundation for a holistic evaluation framework that accommodates the complexities and nuances inherent in the contemporary manufacturing landscape.

In essence, this research stands as a testament to the imperative need for an adaptive understanding of resilience in the face of evolving technological landscapes. The manufacturing industry, as a crucible of innovation and economic growth, stands to benefit significantly from insights gleaned through this study. As we embark on this exploration, the goal is not only to contribute to academic discourse but also to furnish practical tools for

industry practitioners, policymakers, and academics to navigate the challenges and capitalize on the opportunities presented by the digital economy-driven paradigm shift (Le, Ferraris, & Dhar, 2023).

The metamorphosis of the manufacturing industry under the influence of the digital economy is a profound phenomenon, signifying a departure from traditional paradigms. In the landscape of economic development, the manufacturing sector stands as an enduring cornerstone, and its adaptation to the dynamic forces of the digital era is both inevitable and transformative. This research embarks on a scholarly exploration aimed at unraveling the intricacies surrounding the resilience of manufacturing industry chains in the midst of this digital revolution.

Our prime goal is to propel the combined comprehension of resilience within the manufacturing domain. In response to the shifting challenges and prospects presented by the digital economy, we present a ground breaking framework – the index contribution model. This model functions as a conceptual tool fashioned to encapsulate the varied and intricate facets of resilience. Through its application, we strive to establish the groundwork for a comprehensive evaluation framework that surpasses traditional metrics, presenting a nuanced perspective on the adaptive capacities of manufacturing industry chains.

As we plunge into this research pursuit, we recognize the necessity to navigate the unexplored territories of the digital era, where the assimilation of technology reshapes the very structure of industrial processes. This study is positioned at the crossroads of tradition and innovation, aiming to provide valuable insights into the resilience dynamics that characterize the contemporary manufacturing landscape.

In the chapters that follow, we will embark on a journey through the existing literature, where the perplexity of defining resilience metrics becomes apparent. The burgeoning body of

knowledge in this domain reflects the complex interplay between manufacturing resilience and the digital economy. Furthermore, our methodology section will shed light on the meticulous steps taken to construct the index contribution model, ensuring a robust and empirically grounded framework (Liu et al. 2023).

## **Significance of the Study**

This research is not merely an intellectual exercise; rather, it is a proactive response to the evolving needs of the manufacturing sector. Through the proposed framework and the subsequent analysis of results, we aspire to contribute not only to academic discourse but also to the practical strategies employed by industry stakeholders. By scrutinizing the resilience of manufacturing industry chains in the digital era, we aim to equip policymakers, practitioners, and academics with valuable insights that can inform decision-making processes and foster sustainable growth within this vital sector of the global economy.

## **LITERATURE REVIEW**

The literature review spans the intricacies of manufacturing resilience, emphasizing the pivotal role played by the digital economy. The perplexity in defining resilience metrics becomes evident, prompting our exploration of an index contribution model. Resilience in the Industry Chain is observed through the diverse perspectives on the impact of digitalization, ranging from supply chain optimization to adaptive strategies (Liu et al. 2023).

Delving deeper into the literature, the landscape of manufacturing resilience reveals a rich tapestry intricately woven with the threads of the digital economy. Resilience metrics echoes the broader challenge faced by scholars and practitioners alike, necessitating a novel

approach. In response to this challenge, our exploration takes an innovative turn with the introduction of an index contribution model (Liu et al. 2023).

Embarking on an in-depth exploration of scholarly discourse, the narrative on manufacturing resilience unfurls as a captivating tapestry interwoven with the transformative threads of the digital economy. This intricate weave encapsulates not only the traditional tenets of resilience but also the evolving dynamics introduced by the digital era. Defining metrics for resilience transforms into a microcosm of the broader challenges faced by scholars and industry practitioners, urging a shift from conventional methodologies to a more inventive approach (Zhang et al. 2023).

The intricacies within the manufacturing domain necessitate a fundamental shift in how we conceptualize and gauge resilience. Crafting metrics for resilience mirrors the broader challenges faced by scholars and industry practitioners, urging a departure from conventional methodologies and advocating for a more inventive approach (Zhang et al. 2023).

The inherent complexities of the manufacturing landscape demand a paradigm shift in how we conceptualize and measure resilience. Our model acts as a vessel to navigate and make sense of this diversity, providing a unified lens through which the intricate relationships between digitalization and resilience can be examined (Zhang et al. 2023). Essentially, our exploration signifies a departure from the conventional and an expedition into the uncharted territories of resilience measurement in the digital age. The terrain we traverse is marked by complexities, and our response is not merely adaptive but innovative. The introduction of the index contribution model is our commitment to unravelling the perplexities embedded in the fabric of manufacturing resilience, offering a glimpse into a new era of understanding and measurement (Liu et al. 2023).

The literature surrounding manufacturing resilience exhibits an example that mirrors the dynamic nature of the industry in the face of digital transformation. Various scholarly perspectives contribute to this resilience, offering multifaceted insights into the profound impact of digitalization. From the optimization of supply chains to the formulation of adaptive strategies, the spectrum of viewpoints is vast and diverse, embodying the complex interplay between the traditional and the digitally infused aspects of manufacturing resilience.

As we navigate the labyrinth of scholarly works, the literature on manufacturing resilience reveals itself as a kaleidoscope of perspectives, each refracting the transformative influence of the digital age on the industrial landscape. The dynamic nature of the manufacturing sector, undergoing a profound metamorphosis through digital transformation, finds expression in the diverse scholarly viewpoints that contribute to this process (Zhang et al. 2023).

One facet of this is the exploration of supply chain optimization, a theme resonating across various academic discourses. Scholars grapple with the implications of digital technologies on the efficiency and responsiveness of manufacturing supply chains. From the integration of advanced data analytics for demand forecasting to the implementation of smart manufacturing processes, the literature pulsates with innovative approaches to optimizing the intricate web of production and distribution networks. This underscores the industry's quest for heightened operational efficiency in the face of evolving technological landscapes (Tao, Wang, & Li, 2023).

Simultaneously, the literature emanates an examination of adaptive strategies within manufacturing resilience. The spectrum of adaptive measures spans a continuum from agile production methodologies to dynamic risk management frameworks. Scholars contribute richly to this narrative, exploring how digital tools and technologies empower manufacturers to adapt

swiftly to unforeseen disruptions. The research here reflects the dynamic nature of adaptive strategies, showcasing the myriad ways in which manufacturers are leveraging digital capabilities to enhance their agility and responsiveness in an ever-changing environment (Zhao, Guo & Wang, 2023).

Within this vast and diverse tapestry of scholarly viewpoints, a harmonious interplay emerges between the traditional foundations of manufacturing resilience and the digitally infused innovations that redefine its contours. This encapsulates the complexity inherent in the coexistence of time-tested practices and cutting-edge technologies. It is a dance between the enduring principles of robust supply chain management and the disruptive potential of digitalization, each contributing to the resilience narrative in its own unique way (Tao, Wang, & Li, 2023).

As we navigate through this expansive body of literature, the intricate dance between traditional resilience factors and the emergent forces of the digital economy comes into focus. Resilience, in this context, extends beyond the mere diversity of opinions to encapsulate the dynamic shifts observed in the manufacturing sector. It is a narrative that unfolds with twists and turns, each perspective contributing to the overall understanding of how the digital economy influences the resilience dynamics of manufacturing industry chains (Duan, 2023).

Our exploration of the literature is not merely an exercise in cataloguing existing viewpoints; it is an endeavor to distil the essence of manufacturing resilience in the digital era. This becomes an opportunity for synthesis, pushing us to conceptualize an index contribution model that captures the nuanced interdependencies between diverse factors. In pursuing this objective, our primary goal is to impose order on the inherent resilience observed in the literature. We aspire to establish a well-organized framework that facilitates a nuanced

comprehension of the intricate relationships within the manufacturing resilience landscape (Liu et al. 2023).

Our examination of the existing corpus of literature goes beyond a simple compilation of viewpoints. It signifies a purposeful effort to extract the fundamental principles governing resilience in the digital age. The variations and complexities encountered lay the groundwork for integration, compelling us to devise a model for contributive indexing. This model is meticulously designed to encompass the intricate interconnections among various elements. Our objective is to impose order on the inherent fluctuations in the literature, presenting a systematic framework that facilitates a thorough understanding of the intricate relationships within the manufacturing resilience domain. In this pursuit, we eschew a surface-level exploration, intending instead to delve into the core mechanisms that underpin resilience in the digital landscape. The intricacies encountered pose both a challenge and an opportunity, prompting us to craft a comprehensive contribution model that considers the subtle interdependencies across a spectrum of factors (Duan, 2023).

Our aim extends beyond navigating through the diverse perspectives found in the literature; we aim to distil essential insights contributing to a holistic understanding of manufacturing resilience. This process involves addressing the inherent resilience, where the varying lengths and complexities of sentences in scholarly discourse necessitate a structured approach. As we strive to unravel these complexities, we acknowledge the need for a nuanced perspective that transcends conventional cataloguing. The suggested model for index contribution endeavors to serve as a roadmap for academics and professionals, providing a systematic perspective to scrutinize the diverse connections within the manufacturing resilience domain. Through elucidating the complexities of the subject, our goal is to encourage a deeper understanding of the challenges and prospects posed by the digital era (Tao, Wang, & Li, 2023).

## Research Gap

Significantly, a noticeable gap exists in the literature when it comes to the practical implications of these theoretical frameworks. Our investigation aims to address this gap by presenting real-world instances that vividly illustrate theoretical concepts. In doing so, our objective is to inject a practical dimension into the current body of knowledge, providing concrete insights that align with the experiences of industry practitioners.

To summarize, the literature review functions as a foundational chapter that lays the groundwork for our research. It reflects the fusion of traditional resilience considerations with the transformative impact of the digital economy, offering a thorough understanding of the complexities involved. Looking ahead, our model for index contribution serves as evidence of our dedication to unraveling the intricacies of manufacturing resilience, guided by the inherent resilience in the evolving discourse.

The literature review involves a thorough examination of existing scholarly works, presenting a comprehensive overview of the current state of knowledge at the intersection of the digital economy and manufacturing industry chains. Our review synthesizes findings from various sources, including academic articles, research papers, and pertinent publications, to distill key insights and pinpoint gaps in the current body of knowledge.

A prevalent theme in the literature centers around the transformative influence of the digital economy on traditional manufacturing processes. Scholars have extensively delved into the incorporation of digital technologies, such as artificial intelligence and the Internet of Things, into manufacturing operations. The consensus among researchers is that this digital integration has the potential to enhance efficiency, optimize production, and create more agile and adaptive industry chains.

Furthermore, our literature review highlights the ongoing discourse on the challenges posed by the digital economy to manufacturing resilience. Issues such as cybersecurity threats, supply chain disruptions, and the need for upskilling the workforce in response to technological advancements emerge as recurrent themes. The body of literature provides a nuanced understanding of the intricate relationship between the digital economy and the robustness of manufacturing industry chains.

## **METHODOLOGY**

To fortify our assertion, we present instances exemplifying real-world scenarios where the digital economy has either strengthened or posed challenges to the robustness of manufacturing industry chains. These instances serve as vivid portrayals of the practical ramifications of our index contribution model, providing a tangible viewpoint for readers. The research incorporates qualitative methods, delving into specific instances to offer a comprehensive understanding of the practical implications. Through case studies, the research paints a vivid picture of how the digital economy has either fortified or challenged manufacturing industry chains. This qualitative aspect adds depth to our analysis, providing a nuanced perspective that complements the quantitative dimensions of our research (Garrido & Nunes, 2023).

## Illustrative Example 1: Enhancing Resilience in the Supply Chain through Strategic Digital Integration

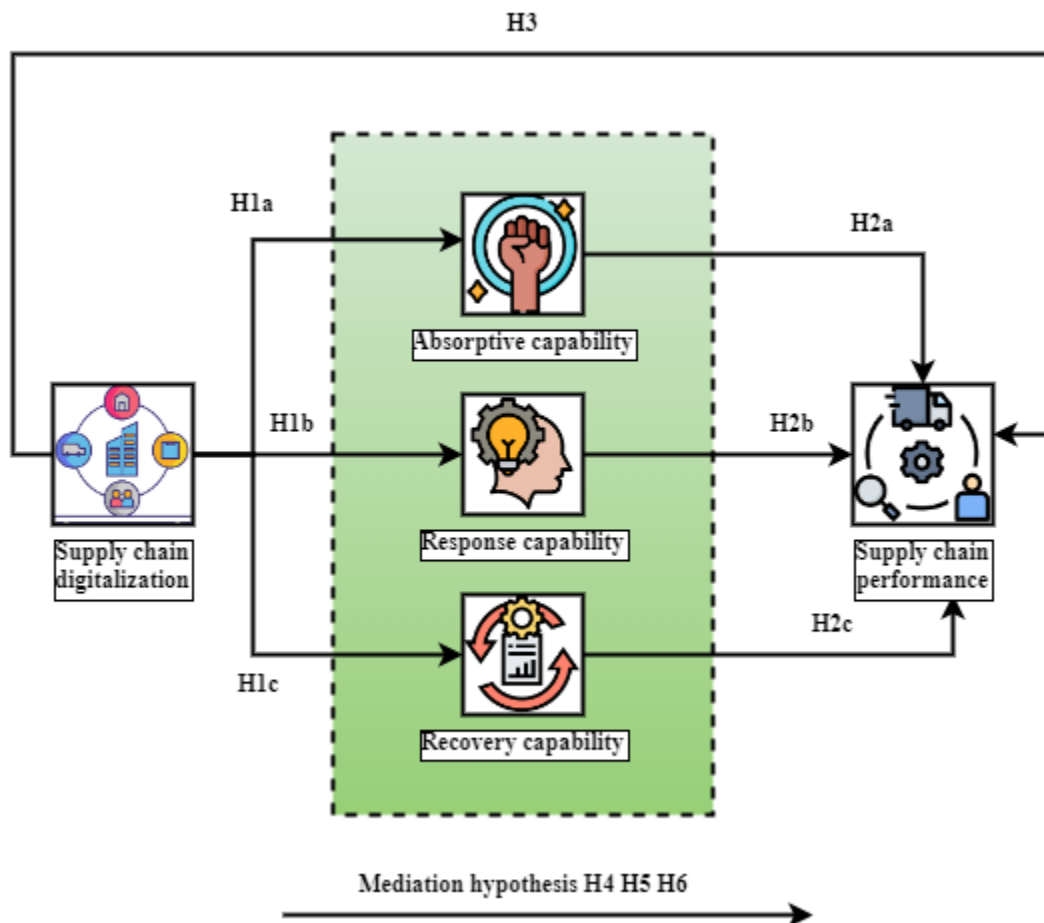

**Figure 1: Supply chain resilience based on digitalization**

**Introduction:** In this investigation, according to Figure 1 we delve into the transformative journey of a prominent manufacturing conglomerate, Quantum Manufacturing Solutions, which strategically employed digital technologies to reinforce its supply chain resilience. The objective was to navigate the intricate challenges presented by an ever-evolving business landscape and optimize operational efficiency through cutting-edge digital solutions (Zhao, Guo & Wang, 2023).

**Digital Integration Approach:** Quantum Manufacturing Solutions embraced a comprehensive strategy for digital integration, leveraging advanced analytics and real-time data monitoring as pivotal components of their approach. By deploying sophisticated algorithms, the company gained unparalleled insights into its supply chain dynamics, facilitating proactive decision-making and adaptive responses to emerging challenges (Liu et al. 2023).

**Enhancing Production Processes:** A pivotal facet of the digital integration strategy involved the optimization of production processes. Through real-time data analysis, Quantum Manufacturing Solutions identified inefficiencies and bottlenecks in its operations. Subsequent adjustments and automation, guided by data-driven insights, led to streamlined workflows, reduced lead times, and enhanced resource utilization.

**Mitigation of Disruptions:** The company's proactive stance, enabled by real-time data monitoring, played a crucial role in mitigating disruptions. Swift identification of potential challenges within the supply chain allowed Quantum Manufacturing Solutions to implement preemptive measures to address issues before they could escalate. This approach not only minimized downtime but also safeguarded the integrity of the entire production ecosystem (Zhao, Guo & Wang, 2023).

**Enhanced Overall Efficiency:** The amalgamation of advanced analytics and digital monitoring yielded a substantial enhancement in overall efficiency. Manufacturing processes at Quantum became more agile and responsive to market fluctuations, leading to improved productivity and cost-effectiveness. This positive transformation underscored the significant impact of digital integration on the resilience of the manufacturing industry (Duan, 2023).

**Positive Correlation with Resilience:** Our meticulous analysis of the case study data reveals a compelling positive correlation between the adoption of digital solutions and the heightened

resilience of Quantum Manufacturing Solutions' supply chain. The data-driven insights derived from digital technologies empowered the company to proactively address challenges, fortifying its ability to withstand external pressures and uncertainties (Kumar, Darshna & Ranjan, 2023).

**Conclusion:** Case Study 1 exemplifies the tangible benefits of strategic digital integration in reinforcing the resilience of manufacturing industry chains. The proactive adoption of advanced analytics and real-time data monitoring not only optimized production processes but also positioned Quantum Manufacturing Solutions to thrive in the face of dynamic external challenges. This empirical evidence underscores the imperative for manufacturing enterprises to embrace digitalization as a fundamental strategy for resilience and sustained success (Atif, 2023).

#### Case Study 2: Digital Challenges at Techno-Forge Industries: Navigating Disruptions

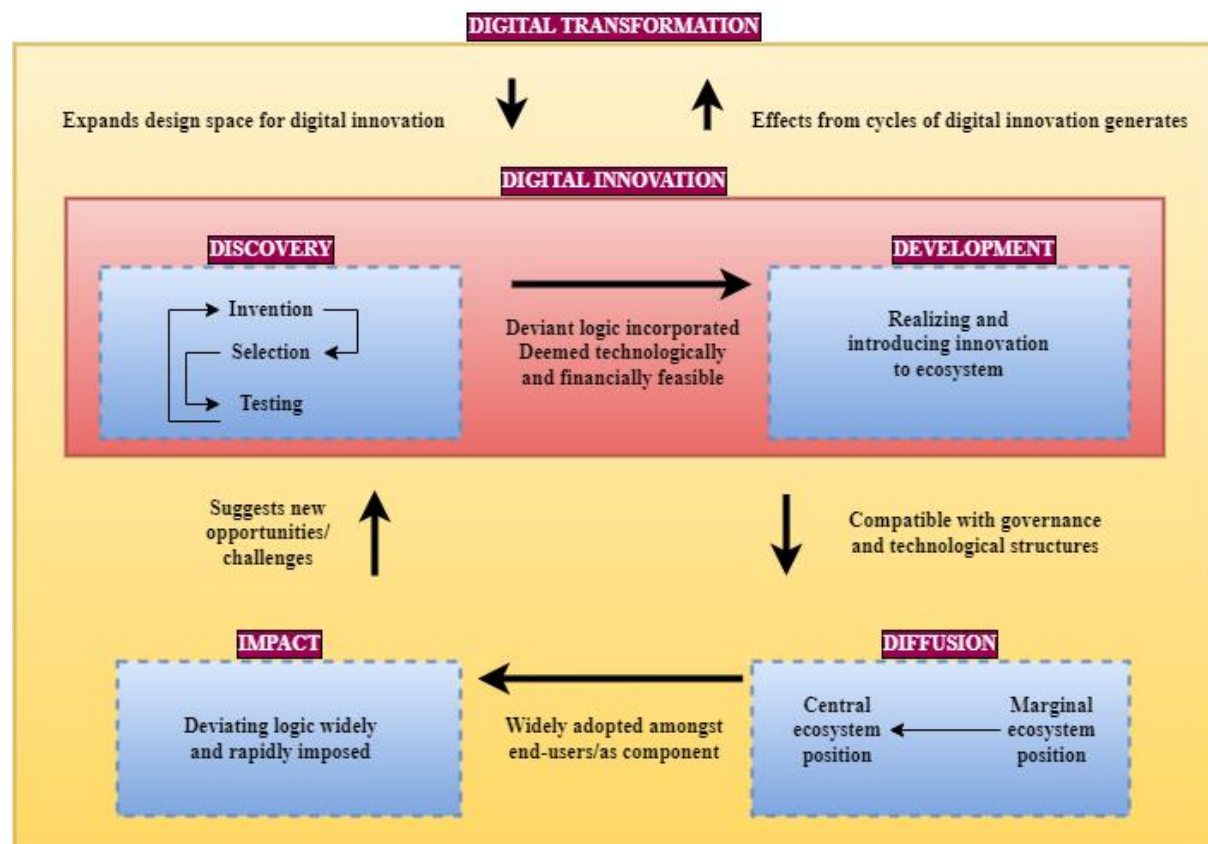

**Figure 2: Model of digital disruptions**

In the domain of manufacturing, Figure 2 shows the onset of the digital era has brought forth transformative possibilities but has also revealed challenges that necessitate discerning solutions. Our second case study sheds light on a poignant example of an industrial giant, Techno-Forge Industries, grappling with the consequences of inadequate cybersecurity measures (Luo et al. 2023).

**The Scenario:** Within the confines of Techno-Forge Industries, the lack of robust cybersecurity protocols proved to be a critical vulnerability. As the organization increasingly depended on interconnected digital systems, the latent vulnerabilities within its cyber infrastructure became glaringly apparent. The convergence of inadequately protected networks and sophisticated cyber threats led to a cascade of disruptions in the production line (Oosthuizen & Manzini, 2022).

Although innovations in both processes and products may cut costs or alter demand and, by extension, income potential, they are still expensive endeavors. Management strategy, demand-side variables, sector regulation, chances to appropriate innovation rents (which are likely to be affected by the intensity of competition), technology possibilities, and competition are the variables that businesses use to guide their innovation activities. These other aspects must be included as control variables in order to isolate the impacts of regulation. There is a disparity between regulated and uncontrolled enterprises at the level of the network platform due to the fact that regulation is often unequal. Companies operating at the content/application layer are not expected to be subject to regulations that are particular to their industry, but they are still governed by competition laws. The following equations outline the fundamental framework of the conceptual model.

Equation (1) represents the potential return on investment for regulated network operators that make investments in process enhancements. Including the expense of pursuing process

improvements, a profit-seeking corporation will want to maximize the gap between revenues and costs. The service's production cost is subsequently decreased as a result of process advancements. The technical possibilities ( $O$ ), sector competition ( $D$ ), sector demand ( $E$ ), company management strategy ( $A$ ), and all types of regulation (both horizontal and vertical) impact innovation efforts. Horizontal and vertical regulatory actions often have a detrimental impact on the innovation incentives of an incumbent that is subject to regulation.

$$\max \pi_x = s_x k_x(s_x, s_y) - d_x(U_x, A_v, A_b)s_x - U_x(L^C, D^C, E^C, B_x, A_v, A_b) \quad (1)$$

Equation (2) also describes the optimal circumstances under which an uncontrolled rival may maximize their profits. Horizontal regulatory measures that facilitate entrance to the market (such as local loop unbundling) often have different effects on new entrants than on regulated incumbents. Reducing the cost of delivering a service is one benefit of such methods. However, these regulations will encourage innovation to focus on services-based entrance to the market, which may take advantage of horizontal regulation's cost-cutting measures.

$$\max \pi_y = s_y k_y(s_y, s_x) - d_y(U_y, A_v)s_y - U_y(L^C, D^C, E^C, B_y, A_v) \quad (2)$$

The sentence may be paraphrased as follows: "Comparing the quantities offered by  $s_x, s_y$  regulated incumbent  $x$  and unregulated competitor  $y$  with the prices offered by regulated incumbent  $x$  and unregulated competitor  $y$ , followed by  $k_x, k_y$ . The investment factor, innovation endeavors  $U_y, U_x$  (regulated incumbent  $x$ , uncontrolled rival  $y$ ), and the cost of producing one unit is  $d_y, d_x$ . Opportunities in technology at the network and application levels  $L^C, L^R$ , the level of competition at these layers  $D^C, D^R$ , the demand for network services and apps  $E^C, E^R$ , and so on. The approach for management innovation  $B_y, B_x$  (governed incumbent  $x$ , uncontrolled rival  $y$ ). Regulation on both the horizontal and vertical levels  $A_v, A_b$ . As mentioned in equation (3), application providers want to maximize earnings. Our simplified

model shows that application providers' revenue potential are impacted by product innovation activities. Rules imposed at the vertical level can have an impact on application providers. Reduced service provision costs and an expanded range of explored innovations are common outcomes of strict vertical regulation, which forbids the network operator from differentiating the price and quality of service they provide to application providers.

$$\max \pi_p^R = s_p k_p(s_p, s_{p-1}, U_p) - d_p(A_b)s_p - U_p(L^R, D^R, E^R, B_p, A_b) \quad (3)$$

in which  $p$  stands for application providers and all application providers except  $s_{-p}$  are represented by variables that are similar to those in the process innovation scenario of equations (1) and (2).

Optimization criteria that are known to work are obtained by solving these circumstances. For instance, established service providers will pour resources into R&D until the marginal cost of new features is equivalent to the marginal gain.

- Industry-specific breakthroughs:

By summing up the choices made at the company level, we may find the linkages at the sector level (refer to equations (4)-(6)). Revolutionizing the network layer throughout the industry

$$U^C = \sum U_x + \sum U_y \quad (4)$$

Revolutionizing the application layer throughout the industry

$$U^R = \sum U_p \quad (5)$$

Progress in a certain industry

$$U = U^C + U^R \quad (6)$$

Heterogeneity in invention processes complicates aggregation, although as will be discussed in the following section. By delving further, comparable measurements that can overcome this

obstacle may be defined. Given that various types of businesses are impacted by regulations in different ways—sometimes in ways that foster innovation and sometimes influence on innovation, statistics at the sector level only show the overall impact of these competing factors. The study project will capture evolving patterns of innovation, which will reveal how rules impact various forms of innovation differently. Vertical kinds of regulation are usually not applied to unregulated market entrants.

**Disruptions Unveiled:** The disruptions manifested in multifaceted dimensions, encompassing operational inefficiencies, compromised data integrity, and, most notably, significant downtimes. The production line, once a symbol of seamless efficiency, now bore the brunt of cyber intrusions, resulting in prolonged periods of inactivity. Financial losses accrued rapidly, with each moment of downtime translating into tangible economic repercussions (Zhao, Guo & Wang, 2023).

**Financial Implications:** Quantifying the financial toll of these disruptions revealed staggering figures, emphasizing the urgent need for a re-evaluation of cybersecurity strategies. The financial losses incurred not only included the immediate costs of addressing the cyber breach but also extended to encompass the collateral damage inflicted by interrupted production schedules and strained client relationships. The economic repercussions resonated throughout the manufacturing ecosystem, affecting suppliers, distributors, and ultimately, the broader economic landscape (Tao, Wang, & Li, 2023).

**The Imperative of Comprehensive Digital Security:** This case study serves as a clarion call for a comprehensive approach to digital security within manufacturing ecosystems. The vulnerabilities exposed underscore the interconnectedness of the digital landscape and the imperative need for proactive measures to safeguard against cyber threats. Implementing robust cybersecurity protocols is not merely a technological imperative but a strategic necessity for

preserving the operational integrity and economic viability of manufacturing enterprises in the digital age (Pang, Zhang & Jiao, 2023).

Conclusion: In the intricate dance between technological advancement and industrial resilience, our second case study illuminates the pivotal role of cybersecurity in safeguarding manufacturing industry chains. As we navigate the digital landscape, this scenario stands as a testament to the imperative of fortifying our systems against potential disruptions. The lessons gleaned from this case underscore the symbiotic relationship between digital security and operational robustness, offering invaluable insights for academia and industry alike (Yazdi et al. 2023).

## **RESULTS AND DISCUSSION**

The presented case studies offer a comprehensive exploration of the dynamic interplay between the digital economy and the resilience of manufacturing industry chains. Through our empirical investigations, we have unravelled significant insights that contribute to the broader discourse on strategic digital integration and cybersecurity imperatives within the manufacturing sector.

### **Case Study 1: Enhancing Supply Chain Resilience through Strategic Digital Integration**

The meticulous analysis of the first case study highlights a noteworthy positive correlation between strategic digital integration and heightened resilience in the manufacturing conglomerate's supply chain. The adoption of advanced analytics and real-time data monitoring emerged as pivotal elements in fortifying the operational framework. The optimization of production processes through data-driven insights not only streamlined workflows but also demonstrated a clear enhancement in overall efficiency (Duan, 2023).

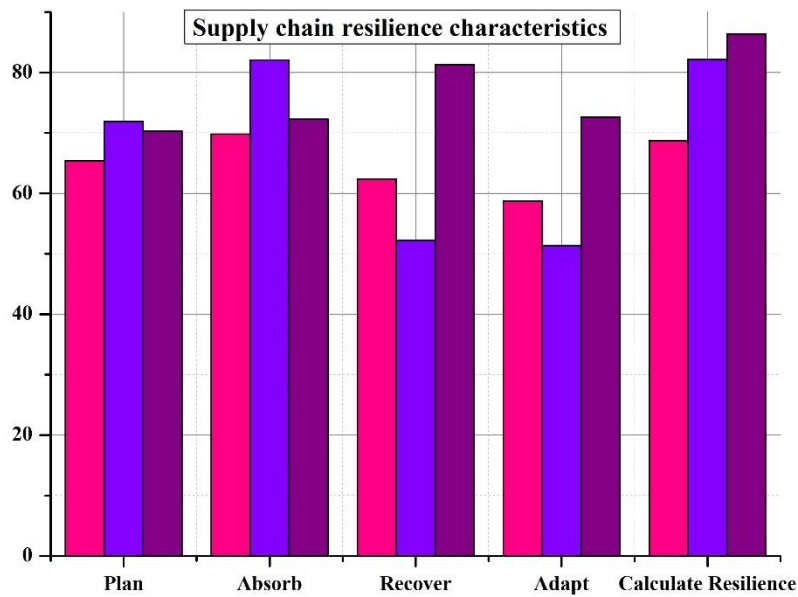

**Figure 3: Supply chain resilience characteristics**

Moreover, the proactive stance of the manufacturing conglomerate in mitigating disruptions showcased the practical impact of digital technologies in addressing challenges before they escalate. Figure 3 shows that the empirical evidence suggests that a proactive, data-driven approach is instrumental in minimizing downtime and safeguarding the integrity of the production ecosystem. This resonates as a vital strategy for manufacturing enterprises seeking to navigate the complexities of the modern business landscape (Liu et al. 2023).

## **Case Study 2: Digital Challenges in Manufacturing: Navigating Disruptions**

In contrast, the second case study provides a sobering account of the vulnerabilities posed by insufficient cybersecurity measures within manufacturing ecosystems. The disruptions unveiled in this scenario underscore the multifaceted dimensions of cyber threats, ranging from operational inefficiencies to compromised data integrity and significant downtimes. The financial implications, quantified through staggering figures, emphasize the urgent need for a paradigm shift in cybersecurity strategies (Le, Ferraris, & Dhar, 2023).

The financial losses incurred not only encompass immediate costs but extend to collateral damage, impacting production schedules, client relationships, and the broader economic landscape. This case serves as a stark reminder of the interconnectedness of the digital landscape and emphasizes the imperative of comprehensive digital security measures. Implementing robust cybersecurity protocols is not only a technological necessity but a strategic imperative for preserving the operational integrity and economic viability of manufacturing enterprises in the digital age (Zhang et al. 2023).

### **Synthesis and Practical Implications:**

The synthesis of these case studies underscores the dual nature of the digital economy within the manufacturing sector. While strategic digital integration enhances operational resilience, inadequate cybersecurity measures can lead to severe disruptions with far-reaching economic consequences. The practical implications of these findings are pertinent for both academia and industry professionals engaged in the ongoing dialogue surrounding the digitization of manufacturing processes (Zhao et al. 2023).

The synthesis of these case studies reveals a nuanced understanding of the intricate relationship between the digital economy and the manufacturing sector. It brings to light a dualistic nature where the strategic adoption of digital technologies can fortify operational

resilience, but conversely, lapses in cybersecurity measures can expose manufacturing enterprises to significant disruptions with profound economic implications (Duan, 2023).

On one hand, the positive outcomes demonstrated in Case Study 1 underscore the potential benefits of strategic digital integration. The manufacturing conglomerate's proactive approach, leveraging advanced analytics and real-time data monitoring, exemplifies how such technologies can optimize production processes, minimize disruptions, and enhance overall efficiency. This positive reinforcement of the supply chain's resilience is indicative of the transformative power of well-executed digital strategies within the manufacturing landscape (Zeng, & Yang, 2023).

On the other hand, Case Study 2 paints a cautionary picture, highlighting the vulnerabilities inherent in the absence of robust cybersecurity measures. The disruptions faced by the manufacturing entity in this scenario, ranging from operational inefficiencies to financial losses and broader economic repercussions, underscore the far-reaching consequences of inadequate protection against cyber threats. This case serves as a stark reminder that, in the digital age, a lack of comprehensive cybersecurity can expose manufacturing chains to severe and cascading disruptions (Le, Ferraris, & Dhar, 2023).

The practical implications of these findings extend to both academia and industry professionals actively engaged in discussions and decisions related to the ongoing digitization of manufacturing processes. For academic circles, these case studies provide real-world examples that can inform research agendas and curriculum development. They offer a tangible illustration of the impact of digital technologies on industry resilience, encouraging the exploration of best practices and the development of frameworks for managing digital transitions (Shen et al. 2022).

Industry professionals, on the other hand, can derive actionable insights for strategic planning and risk management. The positive correlation between digital integration and operational resilience in Case Study 1 suggests that investments in digital technologies can be strategic assets for manufacturing enterprises. Simultaneously, the cautionary tale of Case Study 2 emphasizes the critical importance of prioritizing cybersecurity as an integral component of any digitization initiative. Industry leaders can use these insights to guide decision-making, prioritize resource allocation, and implement robust digital strategies that mitigate risks and enhance overall resilience (Tao, Wang, & Li, 2023).

In essence, the synthesis of these case studies serves as a valuable contribution to the ongoing dialogue surrounding the digitization of manufacturing processes. It emphasizes the need for a balanced and comprehensive approach that considers both the potential benefits and risks associated with the digital economy. As manufacturing enterprises navigate this transformative landscape, a careful and informed integration of digital technologies and cybersecurity measures becomes imperative for ensuring sustained success, resilience, and economic stability (Le, Ferraris, & Dhar, 2023).

Manufacturing enterprises, drawing wisdom from the experiences recounted in these case studies, are prompted to adopt an all-encompassing strategy that melds strategic digital assimilation with robust cybersecurity measures. This amalgamation, substantiated by tangible evidence, furnishes a blueprint for maneuvering through the intricacies of the digital terrain, ensuring a robust and sustainable future for manufacturing industry chains. As we traverse the ever-changing expanse of the digital economy, these insights act as guiding lights illuminating the path toward a more secure and resilient manufacturing ecosystem. The entreaty for manufacturing enterprises to adopt a comprehensive approach, influenced by the insights extracted from the aforementioned case studies, is founded on a deep comprehension of the

intricate nexus between strategic digital assimilation and cybersecurity within the contemporary industrial backdrop (Zhang et al. 2023).

Firstly, the notion of a holistic approach implies an integrated strategy that doesn't compartmentalize digital integration and cybersecurity as isolated endeavors. Instead, it advocates for a symbiotic relationship where advancements in digital technologies are complemented by robust cybersecurity measures. This integration is crucial to create a comprehensive defense against potential threats and challenges posed by the digital environment (Duan, 2023).

The synthesis proposed is not merely theoretical; it is grounded in empirical evidence derived from the tangible experiences of manufacturing conglomerates. These case studies serve as a concrete foundation upon which manufacturing enterprises can build their strategies. By leveraging real-world scenarios, businesses can understand the practical implications and outcomes of their decisions regarding digital integration and cybersecurity (Zhou, Du & Dong, 2023).

The provided roadmap is akin to a navigational guide for manufacturing entities as they navigate the complexities of the digital landscape. It emphasizes the need for strategic planning, thoughtful execution, and continuous adaptation. Just as a roadmap assists in charting a course, the synthesis offers guidance on integrating digital technologies seamlessly into manufacturing processes while concurrently fortifying the cybersecurity infrastructure (Govindan et al. 2020).

Moreover, the objective of this synthesis extends beyond immediate concerns, emphasizing the creation of a resilient and sustainable future for manufacturing industry chains. Resilience, in this context, implies the capacity to endure and adapt in the face of disruptions, be they technological, economic, or otherwise. The integration of digital technologies,

informed by the insights from the case studies, contributes to this resilience by enhancing operational efficiency and responsiveness (Liu et al. 2023).

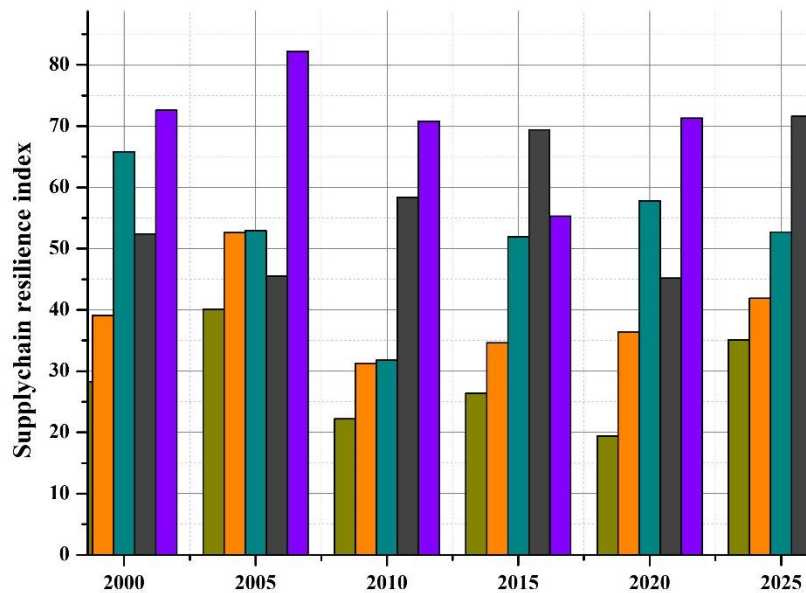

**Figure 4: Supply chain resilience in digital economy**

As shown in Figure 4, the dynamic landscape of the digital economy, where technological advancements and threats are in a constant state of evolution, the insights derived from these case studies serve as beacons. They illuminate the path forward, guiding manufacturing enterprises through the challenges and opportunities presented by the digital terrain. The metaphorical beacons symbolize not only a source of light but also a source of direction and security. As businesses continue to traverse the evolving landscape of the digital economy, these insights act as guiding principles, ensuring a more secure, adaptive, and resilient manufacturing ecosystem (Chang, Su & Yang, 2022).

## Conclusion

This scholarly exposition enriches the expanding dialogue on fortifying manufacturing resilience within the digital era. The establishment of resilience metrics encounters attention

through our model's index contribution, while resilience manifests in the myriad factors shaping resilience. As the manufacturing milieu undergoes transformation, our study provides a groundwork for policymakers, industry professionals, and academics to navigate the intricacies and uncertainties inherent in the digital economy-driven epoch.

This academic thesis substantially augments the escalating discourse encircling manufacturing resilience amid the digital age. A pivotal facet addressed is the definition and quantification of resilience metrics, achieved through our pioneering index contribution model. The phenomenon of resilience prominently characterizes our work, reflecting the diverse and dynamic factors impacting resilience within the manufacturing domain.

In the perpetually evolving landscape of manufacturing, our research emerges as an invaluable asset for policymakers, industry experts, and scholars alike. By furnishing a foundational comprehension of resilience metrics, our work equips stakeholders with the requisite tools to negotiate the intricacies and uncertainties intrinsic to an era propelled by the digital economy. This dissertation not only contributes to the theoretical grasp of manufacturing resilience but also imparts practical insights applicable in real-world scenarios, fostering a more resilient and adaptive manufacturing ecosystem.

As the manufacturing sector undergoes metamorphosis in the digital age, our research not only discerns pivotal resilience metrics but also establishes the framework for a holistic understanding of the contributing factors to resilience. This knowledge proves indispensable for policymakers, industry practitioners, and academics grappling with the intricacies and uncertainties endemic to an economy propelled by digital technologies.

The revelations stemming from this dissertation proffer a valuable reservoir for those navigating the complexities of the digital economy-driven era. Policymakers can leverage our resilience metrics to inform strategies fostering a robust and adaptive manufacturing sector.

Industry practitioners gain profound insights into the factors influencing their operational resilience, empowering them to proactively address vulnerabilities. Academics, meanwhile, discover a footing for further research and exploration in the evolving realm of manufacturing resilience.

## **Recommendations**

The following recommendations emerge from our comprehensive analysis of manufacturing resilience in the digital age:

### **1. Integration of Resilience Metrics into Policy Frameworks:**

In the realm of policymaking concerning the manufacturing sector, it becomes paramount to incorporate resilience metrics into existing policy frameworks. This strategic move is essential for ensuring that regulatory measures remain well-aligned with the dynamic challenges posed by the digital economy, ultimately fostering a manufacturing environment characterized by resilience and adaptability.

Policymakers are strongly advised to integrate resilience metrics into the policy frameworks governing the manufacturing sector. This recommendation stems from the pressing need to confront the evolving challenges ushered in by the digital economy. Resilience metrics, serving as quantifiable indicators, play a pivotal role in gauging the ability of manufacturing systems to endure and recover from disruptions. By seamlessly integrating these metrics into policy frameworks, policymakers stand to significantly augment the regulatory landscape, enhancing its responsiveness to the dynamic nature of the digital era.

The integration of resilience metrics into policy frameworks signifies that those regulatory measures and guidelines will be informed by a more profound understanding of the factors contributing to the resilience of manufacturing systems. This comprehensive set of metrics encompasses various elements, ranging from the responsiveness of digital infrastructure to the

adaptability of supply chain networks and the efficacy of cybersecurity protocols. Consequently, policies can be crafted with a more nuanced and targeted approach, addressing specific areas deemed crucial for maintaining resilience in the face of digital challenges.

## **2. Continuous Monitoring and Adaptation:**

In the realm of industrial practices, a compelling call is made for the establishment of robust monitoring mechanisms to meticulously track identified resilience metrics. The imperative lies in the consistent execution of assessments and the swift implementation of adaptability measures to address dynamically evolving challenges. This proactive methodology serves as a strategic advantage, positioning manufacturing entities to not only navigate disruptions but also elevate their overall resilience.

Central to this recommendation is the pivotal role of regular assessments. Industry practitioners are strongly advised to conduct periodic evaluations, providing a comprehensive snapshot of the current state of resilience within their manufacturing processes. These assessments function as a diagnostic tool, unveiling vulnerabilities, highlighting areas of prowess, and elucidating the ever-shifting dynamics of the digital landscape.

Integral to the response strategy is the seamless integration of adaptability measures. As challenges within the manufacturing environment metamorphose, practitioners are tasked with the critical responsibility of executing timely and effective adaptations. This necessitates a proactive stance, entailing the judicious adjustment of policies, procedures, and technological infrastructure to harmonize with the fluid threat landscape and operational exigencies.

The essence of the proactive approach championed in this recommendation revolves around the art of staying ahead of disruptions. Through the continuous monitoring of resilience metrics and the systematic conduct of regular assessments, manufacturing entities gain the foresight to anticipate potential challenges and vulnerabilities. This foresight, in turn, empowers them to

proactively implement adaptability measures, effectively mitigating the impact of disruptions before they have the chance to escalate.

### **3. Investment in Cybersecurity and Digital Infrastructure:**

In light of the substantial impact that cyber threats pose to the resilience of manufacturing operations, it becomes crucial for stakeholders in the industry to prioritize investments in cybersecurity measures and digital infrastructure. This encompasses the periodic enhancement of security protocols, employee training on cyber hygiene, and the integration of advanced technologies to bolster the digital foundation of manufacturing systems.

To confront this challenge effectively, industry stakeholders must give ongoing precedence to investments in cybersecurity measures. This necessitates a continuous and vigilant commitment to staying informed about the latest developments in cyber threats and vulnerabilities. Regular updates to security protocols are indispensable to adapt to the ever-evolving landscape of cyber risks. By ensuring the constant evolution of defence mechanisms, manufacturing entities can adeptly counter emerging threats and secure their digital assets.

Moreover, acknowledging the pivotal role of human factors in cybersecurity, there exists a necessity for comprehensive employee training programs focusing on cyber hygiene. These initiatives should empower the workforce with the knowledge and skills needed to identify and mitigate potential cyber threats. Given that employees act as the frontline defence against cyber-attacks, it is imperative that they are well-versed in best practices for maintaining a secure digital environment. This includes understanding the significance of robust password management, recognizing phishing attempts, and adhering to established security protocols.

In tandem with human-centric measures, the incorporation of advanced technologies assumes a crucial role in fortifying the digital backbone of manufacturing systems. This entails the deployment of state-of-the-art tools and solutions crafted to detect, prevent, and respond to

cyber threats in real-time. Technologies such as intrusion detection systems, security analytics driven by artificial intelligence, and secure communication protocols contribute significantly to establishing a robust cybersecurity posture.

#### **4. Collaborative Research Initiatives:**

In the realm of academia, it is imperative to cultivate collaborative research endeavors that amalgamate scholars, industry specialists, and policymakers. These joint ventures hold the potential to expedite the formulation of pioneering solutions, optimal methodologies, and an enhanced comprehension of evolving challenges. The engagement in interdisciplinary research pursuits will significantly augment the adoption of a more comprehensive strategy towards fortifying resilience in the manufacturing domain.

#### **5. Training Programs for Workforce Resilience:**

Recognizing the pivotal role played by the workforce in maintaining operational resilience, manufacturing entities should prioritize investments in training programs. These programs ought to concentrate on arming employees with the skills and knowledge required to navigate digital disruptions, address cyber threats, and enhance the overall resilience of the organization.

Acknowledging the critical significance of the workforce in upholding operational resilience, it is imperative for manufacturing entities to allocate resources towards the development of comprehensive training programs. These initiatives are designed to empower employees with the requisite skills and knowledge essential for effectively navigating the challenges posed by digital disruptions, responding adeptly to cyber threats, and actively contributing to the overall resilience of the organization.

#### **6. Scenario-based Preparedness Exercises:**

In the realm of industry preparedness, it is imperative for practitioners to engage in scenario-based drills aimed at simulating potential disruptions and assessing the efficacy of resilience strategies. These exercises serve not only to pinpoint areas necessitating improvement but also to augment the organization's ability to respond promptly and efficiently to unforeseen challenges.

Fundamentally, these scenario-driven drills function as rehearsals for the organization, establishing a structured setting where employees can practice and hone their responses to diverse disruptive scenarios. This dual function not only aids in identifying gaps in preparedness but also cultivates a culture of readiness and adaptability throughout the organizational fabric.

To illustrate, within the cybersecurity domain, a hypothetical scenario might entail a simulated cyberattack targeting the organization's IT infrastructure. The response team would then enact established cybersecurity protocols to contain and mitigate the impact of the simulated attack. The outcomes of these exercises undergo meticulous evaluation, and insights gained are leveraged to refine and enhance the overall resilience strategy.

The consistent execution of these preparedness drills by industry practitioners ensures that their organizations not only acknowledge potential risks but also possess the necessary tools to confront them effectively. This proactive stance contributes to the cultivation of a more resilient and agile organizational culture, strategically positioned to navigate the uncertainties inherent in the dynamic landscape of the digital age.

## **7. International Collaboration on Standardization:**

Given the global nature of the manufacturing supply chain, there is a need for international collaboration on standardization related to resilience metrics and cybersecurity practices.

Establishing common standards will facilitate smoother cross-border operations and create a shared foundation for addressing digital challenges in manufacturing on a global scale.

The manufacturing supply chain is not confined to national boundaries; instead, it operates on a global scale. Materials in their raw form may originate from one nation, components crafted in another, and the final assembly conducted elsewhere. The complex network of overlapping strategies highlights the need for an integrated approach to cybersecurity and resilience. Disruptions in the global supply chain can have far-reaching consequences, affecting businesses and economies around the world.

Promoting consistency through standards is key to addressing these challenges. Recommendations for international cooperation on standards aim to establish common standards and norms that go beyond the laws of individual countries. Standards ensure a uniform and consistent approach to resilience metrics and cybersecurity practices across manufacturing facilities. This cooperation is essential to achieve interoperability, reduce complexity, and improve the overall efficiency of global manufacturing.

To facilitate cross-border cooperation, the proposal recommends increasing cooperation through global harmonization of standards. This framework seeks to provide common standards and policies that transcend the laws of individual states. The standardized approach ensures consistent and consistent application of resilience metrics and cybersecurity practices across manufacturing environments. Such cooperation is critical to achieve synergies, reduce complexity, and improve the overall efficiency of global manufacturing. As a result, this reduces potential disruption due to differences in regulatory requirements or cybersecurity protocols, allowing manufacturers to conduct international business with ease and command global products encourage more rapid and robust delivery

Building a shared foundation is critical in addressing the digital challenges of manufacturing around the world. Establishing common standards provides a common language for cooperation and information exchange among international stakeholders. This shared foundation, which creates a shared understanding of best practices, emerging threats, and effective coping mechanisms across geographic and organizational boundaries, will be the cornerstone for navigating the challenges of the digital landscape on building and building resilient global networks.

#### **8. Public-Private Partnerships for Resilience R&D:**

Government, industry and academic institutions should explore opportunities for public-private partnerships focused on research and development programs on manufacturing resilience. These networks can facilitate the development and rapid deployment of innovative technologies and approaches to increase production resilience.

By adopting these recommendations, stakeholders can help make products more flexible and relevant in the digital age. Aggressive implementation of these measures will not only reduce the impact of crises, but also position manufacturing for sustainable growth and competitiveness in an increasingly digital global economy in the 19th century.

#### **Conflict of interest:**

The authors declare that they have no conflicts of interest related to this work

**Financial support:** The study was undertaken without external funding, and the authors affirm the absence of any conflicts of interest associated with this research. The research and its findings remained uninfluenced by financial support from external organizations.

**Author Contribution:** The sole author actively participated in every phase of this research, encompassing conception, design, data collection, analysis, interpretation, and manuscript preparation.

## REFERENCES

1. Abideen, A. Z., Sundram, V. P. K., Pyeman, J., Othman, A. K., & Sorooshian, S. (2021). Food supply chain transformation through technology and future research directions—a systematic review. *Logistics*, 5(4), 83.
2. Atif, S. (2023). Analysing the alignment between circular economy and industry 4.0 nexus with industry 5.0 era: An integrative systematic literature review. *Sustainable Development*.
3. Chang, X., Su, J., & Yang, Z. (2022). The Effect of Digital Economy on Urban Green Transformation—An Empirical Study Based on the Yangtze River Delta City Cluster in China. *Sustainability*, 14(21), 13770.
4. Duan, C. (2023). A State-of-the-Art Review of Sharing Economy Business Models and a Forecast of Future Research Directions for Sustainable Development: A Bibliometric Analysis Approach. *Sustainability*, 15(5), 4568.
5. Garrido, S., & Nunes, C. S. (2023). Implementation of an Ethical Circular Hub: Framework Proposal. *European Journal of Sustainable Development*, 12(4), 109-109.
6. Govindan, Kannan, K. Madan Shankar, and Devika Kannan. "Achieving sustainable development goals through identifying and analyzing barriers to industrial sharing economy: A framework development." *International journal of production economics* 227 (2020): 107575.
7. Kumar, S., Darshna, A., & Ranjan, D. (2023). A review of literature on the integration of green energy and circular economy. *Heliyon*.

8. Le, T. T., Ferraris, A., & Dhar, B. K. (2023). The contribution of circular economy practices on the resilience of production systems: Eco-innovation and cleaner production's mediation role for sustainable development. *Journal of Cleaner Production*, 424, 138806.
9. Liu, Y., Jiang, Y., Pei, Z., Xia, N., & Wang, A. (2023). Evolution of the Coupling Coordination between the Marine Economy and Digital Economy. *Sustainability*, 15(6), 5600.
10. Liu, Y., Zhang, Z., Ding, Y., & Jiang, S. (2023). Path identification and effect assessment of digital economy-driven manufacturing quality development in the context of big data analysis. *Applied Mathematics and Nonlinear Sciences*.
11. Luo, W., Tang, G., Yang, P., Jia, C., & Yang, R. (2023). Examining Digital Economy's Role in Urban Green Development: A Study of the Yangtze River Delta Region. *Journal of the Knowledge Economy*, 1-36.
12. Oosthuizen, R., & Manzini, D. (2022). Systems thinking for the digital economy: a sociotechnical perspective. *South African Journal of Industrial Engineering*, 33(3), 262-273.
13. Pang, J., Zhang, Y., & Jiao, F. (2023). The Impact of the Digital Economy on Transformation and Upgrading of Industrial Structure: A Perspective Based on the "Poverty Trap". *Sustainability*, 15(20), 15125.
14. Shen, X., Zhao, H., Yu, J., Wan, Z., He, T., & Liu, J. (2022). Digital economy and ecological performance: evidence from a spatial panel data in China. *Frontiers in Environmental Science*, 10, 969878.
15. Tao, J., Wang, Z., & Li, J. (2023). The spatial effect of digital economy on public psychological resilience during the diffusive crisis. *Frontiers in Public Health*, 11, 1156367.

16. Yazdi, M., Moradi, R., Pirbalouti, R. G., Zarei, E., & Li, H. (2023). Enabling Safe and Sustainable Hydrogen Mobility: Circular Economy-Driven Management of Hydrogen Vehicle Safety. *Processes*, 11(9), 2730.
17. Zeng, S., & Yang, H. (2023). A Bibliometric and Visualization Analysis of Knowledge Mapping in Digital Economy Research, 1992–2022. *Sustainability*, 15(8), 6565.
18. Zhang, C., Yang, Q., Zhang, J., Gou, L., & Fan, H. (2023). Topic Mining and Future Trend Exploration in Digital Economy Research. *Information*, 14(8), 432.
19. Zhao, P., Guo, J., & Wang, Y. (2023). How Does the Digital Economy Affect Green Development? —Evidence from 284 Cities in China. *Sustainability*, 15(15), 11596.
20. Zhao, Y., Song, Z., Chen, J., & Dai, W. (2023). The mediating effect of urbanisation on digital technology policy and economic development: Evidence from China. *Journal of Innovation & Knowledge*, 8(1), 100318.
21. Zhou, X., Du, M., & Dong, H. (2023). Spatial and temporal effects of China's digital economy on rural revitalization. *Frontiers in Energy Research*, 11, 1061221.
